# Supplementary material
Source: MDPI journal article supplement (https://www.mdpi.com/2076-3417/12/2/881)
Supplement: s1 [file s1]

# Impact of Plant Growth Regulators to Development of the Second Generation Energy Crop *Miscanthus × giganteus* Produced Two Years in Marginal Post-Military Soil

Valentina Pidlisnyuk <sup>1</sup>, Tatyana Stefanovska <sup>2</sup>, Olexander Zhukov <sup>3,\*</sup>, Artem Medkov <sup>4</sup>, Pavlo Shapoval <sup>5</sup>, Vitalii Stadnik <sup>5</sup> and Martyn Sozanskyi <sup>5</sup>

Table S1. Descriptive statistics of morphometric traits of *Miscanthus*.

| Year | Soil | Effect | Number of Stems | Number of Shoots | Length of Roots, cm | Length of Stems, cm | Biomass (wet), g | Biomass (dry), g |
|------|------|--------|-----------------|------------------|---------------------|---------------------|------------------|------------------|
| 2017 | I    | Ch1    | 7.67±0.33       | 1.67±0.33        | 60.00±1.73          | 92.00±8.66          | 65.78±5.06       | 21.69±2.89       |
| 2017 | I    | Ch2    | 7.67±0.33       | 1.67±0.33        | 70.00±6.35          | 96.67±8.99          | 68.90±5.17       | 23.48±3.06       |
| 2017 | I    | R1     | 5.67±0.33       | 1.67±0.33        | 57.00±5.20          | 81.00±11.55         | 55.01±4.04       | 19.16±1.63       |
| 2017 | I    | R2     | 5.00±0.58       | 3.00±0.58        | 49.00±6.93          | 60.00±5.20          | 49.58±3.84       | 15.62±1.93       |
| 2017 | I    | R3     | 5.00±0.58       | 2.67±0.33        | 54.00±4.62          | 59.00±6.93          | 47.40±3.69       | 11.69±1.42       |
| 2017 | I    | S1     | 7.00±0.58       | 1.67±0.33        | 29.00±4.62          | 70.00±4.62          | 42.20±3.46       | 10.18±1.35       |
| 2017 | I    | S2     | 7.00±1.15       | 1.67±0.33        | 39.33±3.38          | 74.00±5.03          | 57.50±3.58       | 17.77±1.84       |
| 2017 | I    | S3     | 6.67±0.88       | 2.67±0.33        | 20.00±2.31          | 70.00±5.77          | 51.63±3.94       | 15.04±1.54       |
| 2017 | I    | W      | 6.67±0.33       | 1.67±0.33        | 20.00±1.15          | 65.00±7.51          | 42.55±4.16       | 12.14±2.77       |
| 2017 | II   | Ch1    | 8.00±1.15       | 1.67±0.33        | 62.00±7.51          | 96.00±7.51          | 73.80±5.31       | 22.48±2.06       |
| 2017 | II   | Ch2    | 8.00±1.15       | 2.67±0.33        | 64.00±5.29          | 98.00±10.39         | 78.59±6.19       | 25.87±4.57       |
| 2017 | II   | R1     | 6.00±0.58       | 1.67±0.33        | 63.00±3.46          | 83.00±6.93          | 62.93±1.67       | 18.86±1.38       |
| 2017 | II   | R2     | 5.00±0.58       | 2.67±0.33        | 52.00±8.66          | 67.00±4.62          | 50.07±5.37       | 14.99±1.67       |
| 2017 | II   | R3     | 5.00±0.58       | 2.67±0.33        | 55.00±8.08          | 61.00±4.62          | 55.60±9.06       | 14.14±1.96       |
| 2017 | II   | S1     | 6.67±0.88       | 1.67±0.33        | 31.33±3.84          | 74.00±2.89          | 53.33±3.62       | 14.72±1.01       |
| 2017 | II   | S2     | 6.67±0.33       | 1.67±0.33        | 51.00±1.15          | 83.00±3.46          | 60.40±1.15       | 19.25±0.22       |
| 2017 | II   | S3     | 6.33±0.67       | 3.00±0.00        | 24.00±2.89          | 68.00±7.51          | 55.37±5.98       | 13.89±1.24       |
| 2017 | II   | W      | 6.33±0.33       | 1.67±0.33        | 22.00±3.46          | 67.00±5.77          | 40.10±7.39       | 9.91±3.08        |
| 2018 | I    | Ch1    | 8.00±0.58       | 2.00±0.00        | 66.00±1.73          | 98.00±9.61          | 59.75±3.46       | 15.86±2.66       |
| 2018 | I    | Ch2    | 10.33±0.67      | 4.00±0.00        | 80.00±7.51          | 124.00±10.39        | 75.71±4.27       | 27.66±2.84       |
| 2018 | I    | R1     | 9.00±0.58       | 2.67±0.33        | 124.00±3.46         | 102.00±6.93         | 63.48±4.49       | 19.64±2.76       |
| 2018 | I    | R2     | 8.00±0.58       | 4.33±0.33        | 91.60±2.31          | 109.00±3.46         | 62.17±2.49       | 21.34±1.43       |
| 2018 | I    | R3     | 9.00±0.58       | 3.67±0.88        | 102.00±1.73         | 106.00±5.77         | 64.60±8.54       | 21.76±1.95       |
| 2018 | I    | S1     | 9.00±0.58       | 2.00±0.00        | 40.00±2.31          | 105.00±4.62         | 57.70±4.03       | 20.51±2.00       |
| 2018 | I    | S2     | 9.00±1.15       | 3.67±0.33        | 53.00±3.46          | 141.00±3.46         | 86.59±3.04       | 38.56±2.07       |
| 2018 | I    | S3     | 8.00±0.58       | 2.67±0.33        | 68.10±6.93          | 99.00±5.20          | 61.32±6.19       | 19.98±2.46       |
| 2018 | I    | W      | 7.00±0.58       | 2.33±0.33        | 23.00±1.21          | 71.00±7.51          | 52.41±2.77       | 14.61±2.37       |
| 2018 | II   | Ch1    | 11.67±0.33      | 2.67±0.33        | 70.90±2.63          | 126.00±7.51         | 74.32±1.04       | 17.55±1.53       |
| 2018 | II   | Ch2    | 13.00±1.15      | 3.67±0.33        | 95.70±7.97          | 128.00±10.39        | 90.14±3.91       | 26.37±1.20       |
| 2018 | II   | R1     | 12.00±1.15      | 2.67±0.33        | 141.00±4.85         | 105.00±4.00         | 77.98±2.37       | 19.34±1.02       |
| 2018 | II   | R2     | 13.00±0.58      | 5.00±0.00        | 115.00±3.12         | 97.00±4.62          | 73.59±7.19       | 16.62±3.67       |
| 2018 | II   | R3     | 12.00±0.58      | 4.33±0.33        | 109.70±3.93         | 91.00±4.62          | 57.60±1.73       | 8.13±1.16        |
| 2018 | II   | S1     | 11.00±1.00      | 2.67±0.33        | 63.00±2.94          | 104.00±2.89         | 60.11±4.20       | 13.55±1.97       |
| 2018 | II   | S2     | 13.00±1.15      | 2.33±0.33        | 71.00±1.73          | 113.00±3.46         | 74.84±3.40       | 22.30±1.75       |
| 2018 | II   | S3     | 11.00±0.58      | 3.00±0.00        | 84.00±3.87          | 98.00±7.51          | 62.65±6.17       | 10.63±1.94       |
| 2018 | II   | W      | 10.00±0.58      | 2.33±0.33        | 23.80±1.90          | 97.00±5.77          | 47.60±3.61       | 7.78±1.16        |

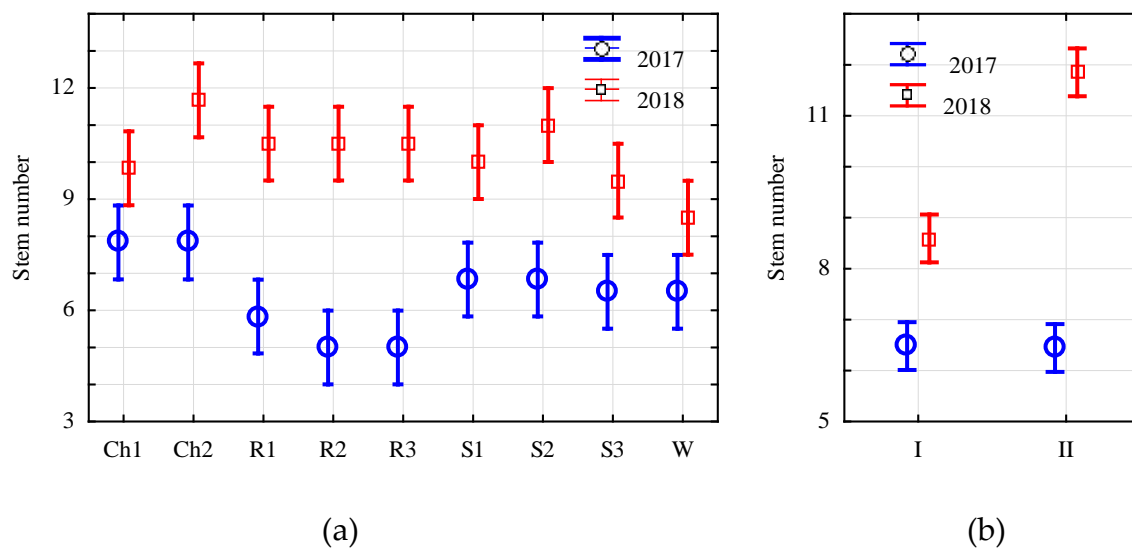

**Figure S1.** The effect of PGRs on stems number (a) and the effect of soil type (b). Squares and circles show least square means. Vertical bars denote 0.95 confidence intervals.

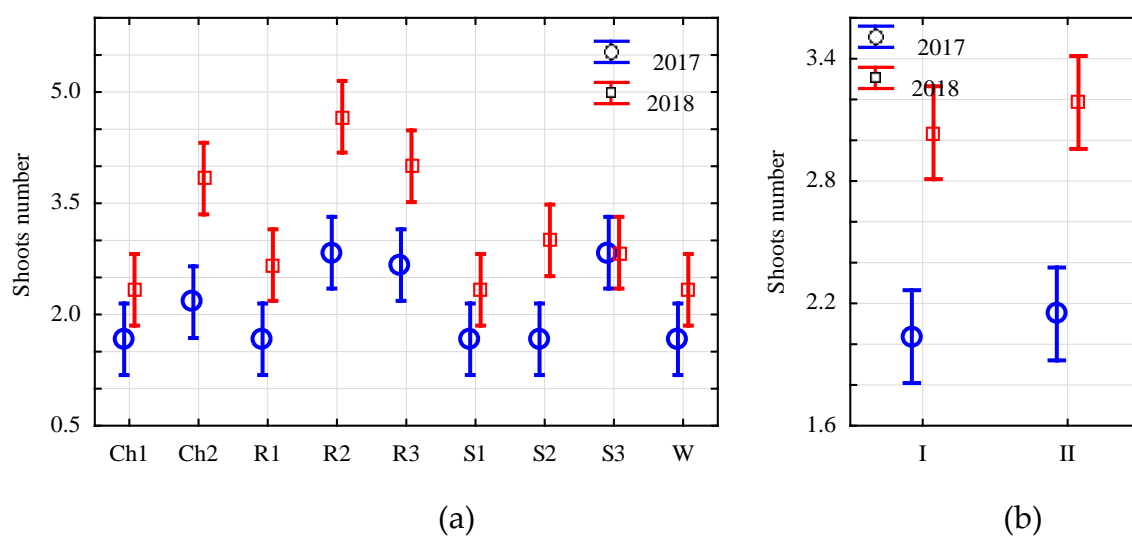

**Figure S2.** The effect of PGRs on shoot number (a) and the effect of soil type (b). Squares and circles show least square means. Vertical bars denote 0.95 confidence intervals.

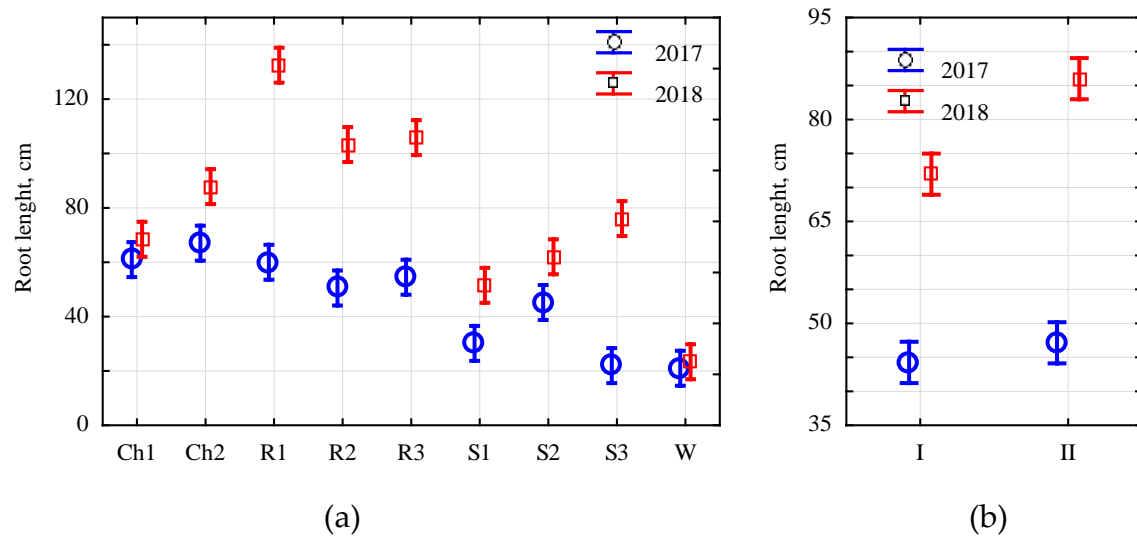

**Figure S3.** The effect of PGRs on root length (a) and the effect of soil type (b). Squares and circles show least square means. Vertical bars denote 0.95 confidence intervals.

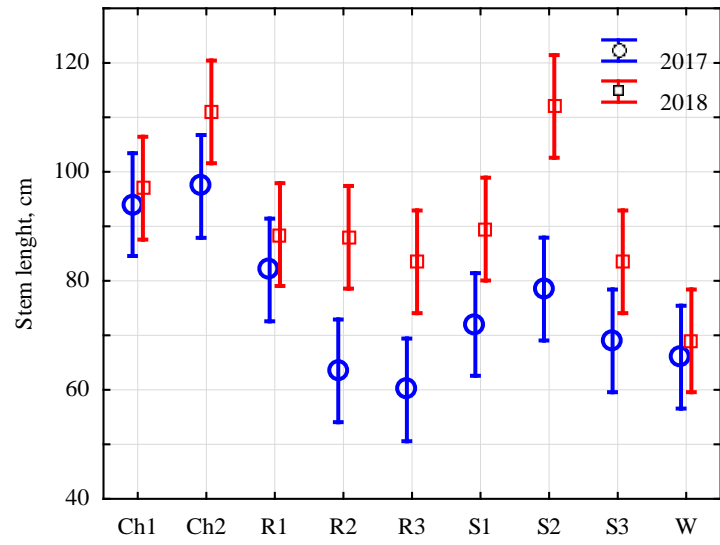

(a)

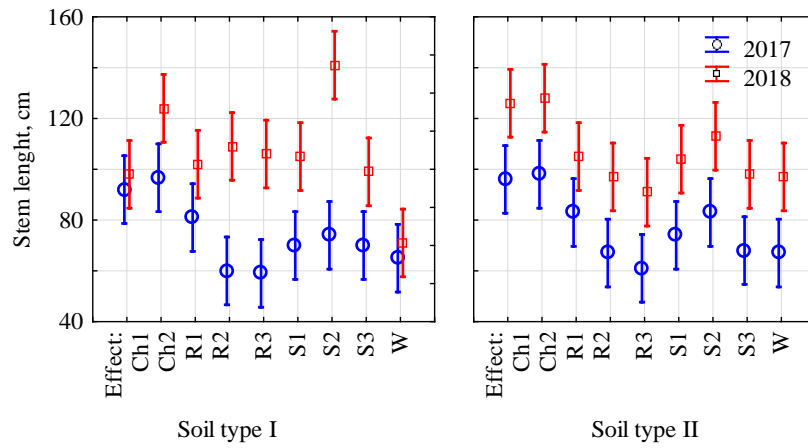

(b)

**Figure S4.** The effect of PGRs on stem length (a) and the effect of soil type (b). Squares and circles show least square means. Vertical bars denote 0.95 confidence intervals.
